# Supplementary material
Source: MDPI journal article supplement (https://www.mdpi.com/2076-3417/8/6/873)
Supplement: s1 [file s1]

# BTS - 600 Prüfprogramm: AK34hart

Datum/Zeit : 14.12.2017 11:40:00

Version : V 1.600.395

Bediener : Digatron

Programm : AK34hart

Titel : AK 34 w/o recharge

| Schritt                                  | Label | Prozedur | Sollwert           | Limit                  | Aktion     | Registrierung  |
|------------------------------------------|-------|----------|--------------------|------------------------|------------|----------------|
| 1                                        |       | SET      |                    |                        |            | Multi<br>1 min |
| 2                                        |       | SET      |                    | > 3.0 VNC<br>< 1.0 VNC | UNT<br>UNT |                |
| 3                                        |       | SET      | EISstart = 0.0     |                        |            |                |
| ! 85 Cycles with EIS measurements before |       |          |                    |                        |            |                |
| 4                                        |       | EISwDCA  |                    |                        |            |                |
| 5                                        |       | PAU      |                    | 4 h                    |            |                |
| 6                                        |       | SET      | Ahtarget = Ah      |                        |            |                |
| 7                                        |       | ELA      | 4.0 ACN20          | < 1.8 V                |            |                |
| 8                                        |       | PAU      |                    | 2 h                    |            |                |
| 9                                        |       | LAD      | 5.0 ACN20<br>2.6 V | > Ahtarget Ah<br>24 h  |            |                |
| 10                                       |       | EISwDCA  |                    |                        |            |                |
| 11                                       |       | PAU      |                    | 30 min                 |            |                |
| 12                                       |       | BEG      |                    |                        |            |                |
| 13                                       |       | LAD      | 2.4 V<br>7.0 ACN20 | 40 min                 |            |                |
| 14                                       |       | ELA      | 7.0 ACN20          | 30 min                 |            |                |
| 15                                       |       | ZYK      | 85*                |                        |            |                |
| 16                                       |       | STO      |                    |                        |            |                |
