# Supplementary material
Source: MDPI journal article supplement (https://www.mdpi.com/2076-3417/8/6/873)
Supplement: s1 [file s1]

# **Supplementary Materials: Determination of SoH of Lead-Acid Batteries by Electrochemical Impedance Spectroscopy**

**Monika Kwiecien <sup>1\*</sup>, Julia Badedda <sup>2</sup>, Moritz Huck <sup>1</sup>, Kuebra Komut <sup>1</sup>, Dilek Duman <sup>1</sup> and Dirk Uwe Sauer <sup>1,3,4,5</sup>**

# 1. Impedance Spectra recorded during *Soft AK3.4*

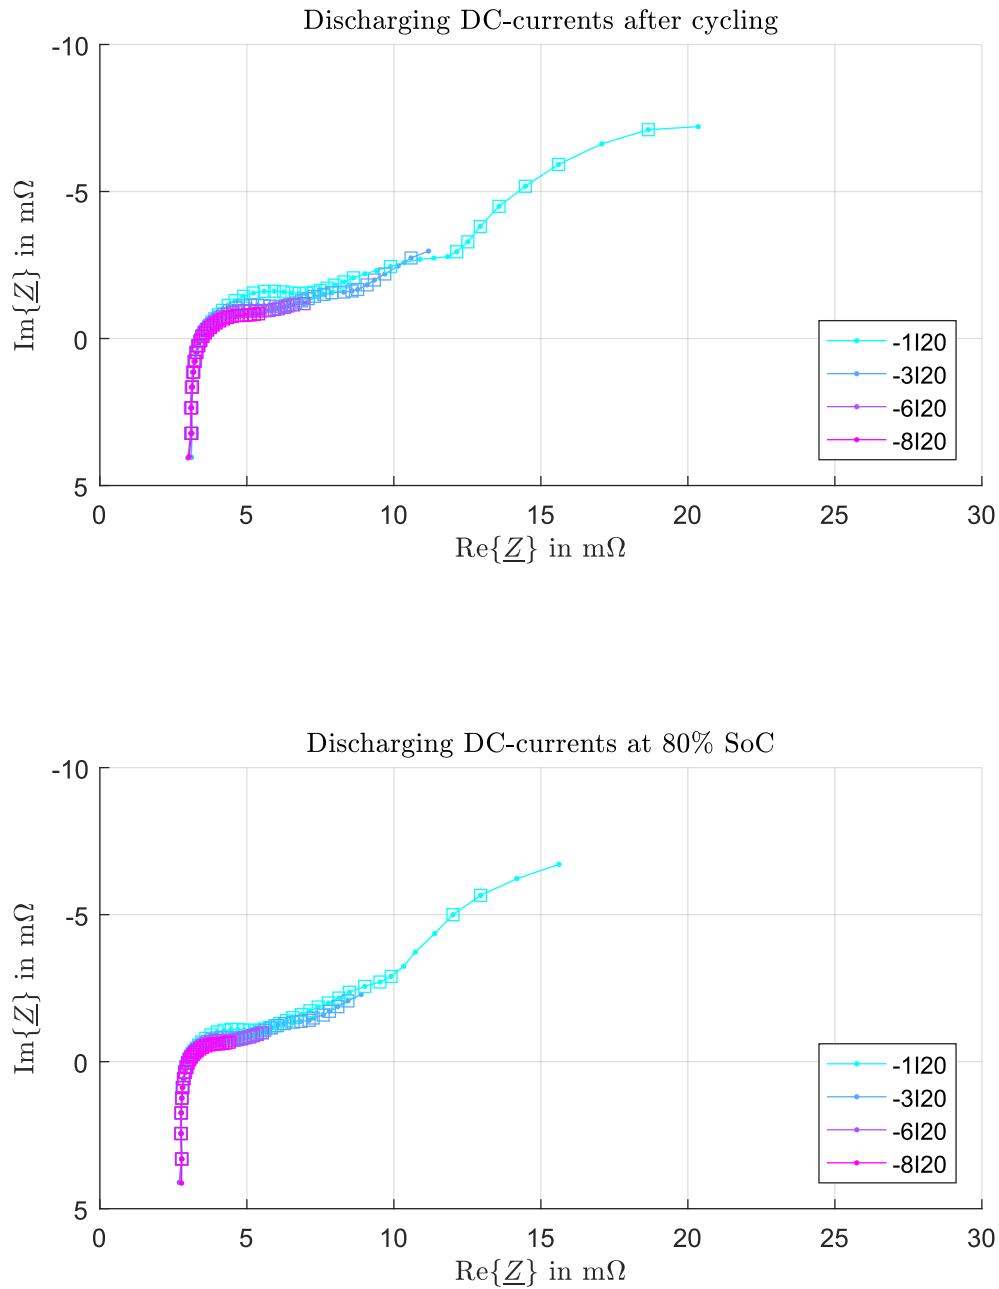

**Figure S1.** Impedance spectra measured on TC1 of *soft AK3.4* with superimposed discharging current after 15 FCE at the end of cycling phase and at 80%.

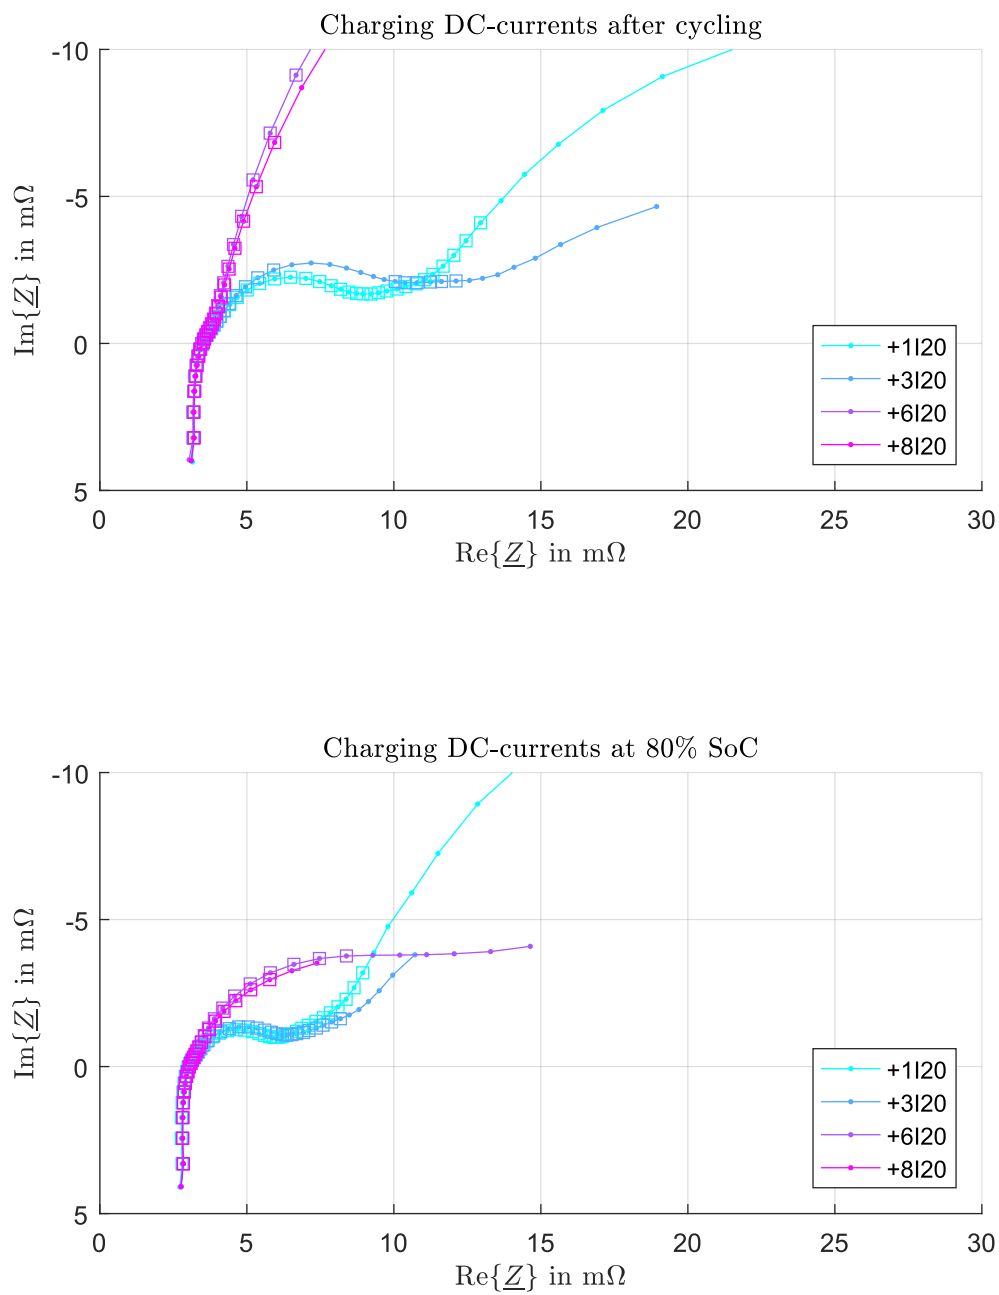

**Figure S2.** Impedance spectra measured on TC1 of *soft* AK3.4 with superimposed charging current after 15 FCE at the end of cycling phase and at 80%.

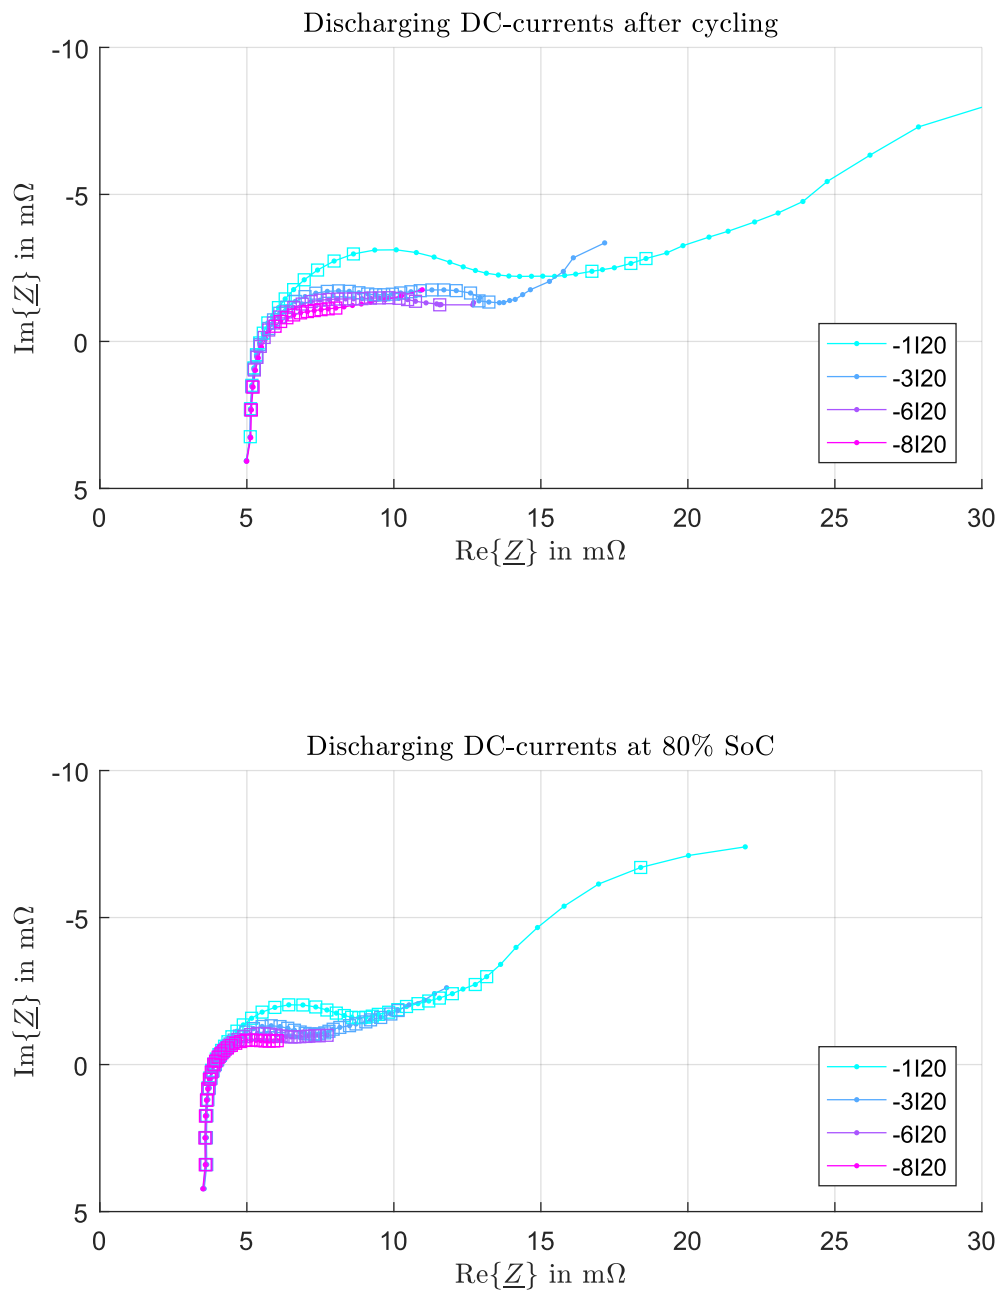

**Figure S3.** Impedance spectra measured on TC1 of *soft* AK3.4 with superimposed discharging current after 90 FCE at the end of cycling phase and at 80%.

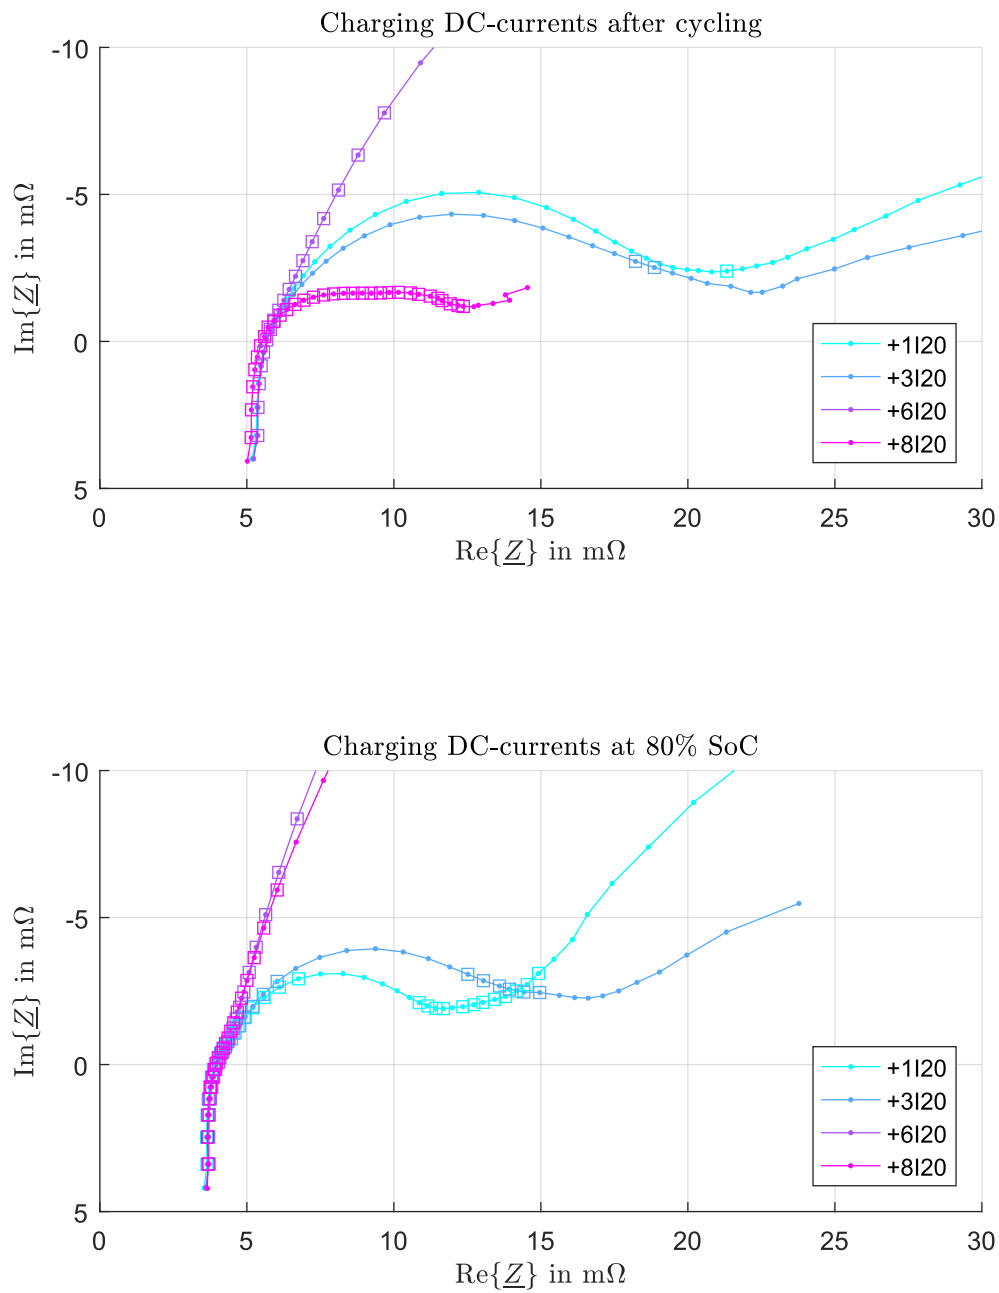

**Figure S4.** Impedance spectra measured on TC1 of *soft* AK3.4 with superimposed charging current after 90 FCE at the end of cycling phase and at 80%.

## 2. Single Impedance Values, further Results

**Table S1.** The average slopes of impedance amplitude increase over capacity loss  $C_{loss}$  for different frequencies and states from  $-3 I_{20}$  impedance spectra.

| Frequencies                  | after cycling | after charging | 80 % SoC    |
|------------------------------|---------------|----------------|-------------|
| $f(Im\{\underline{Z}\} = 0)$ | 0.27 mΩ/Ah    | 0.179 mΩ/Ah    | 0.118 mΩ/Ah |
| 1 kHz                        | 0.27 mΩ/Ah    | 0.21 mΩ/Ah     | 0.115 mΩ/Ah |
| 10 Hz                        | 0.598 mΩ/Ah   | 0.411 mΩ/Ah    | 0.241 mΩ/Ah |
| 0.1 Hz                       | 0.698 mΩ/Ah   | 0.32 mΩ/Ah     | 0.25 mΩ/Ah  |

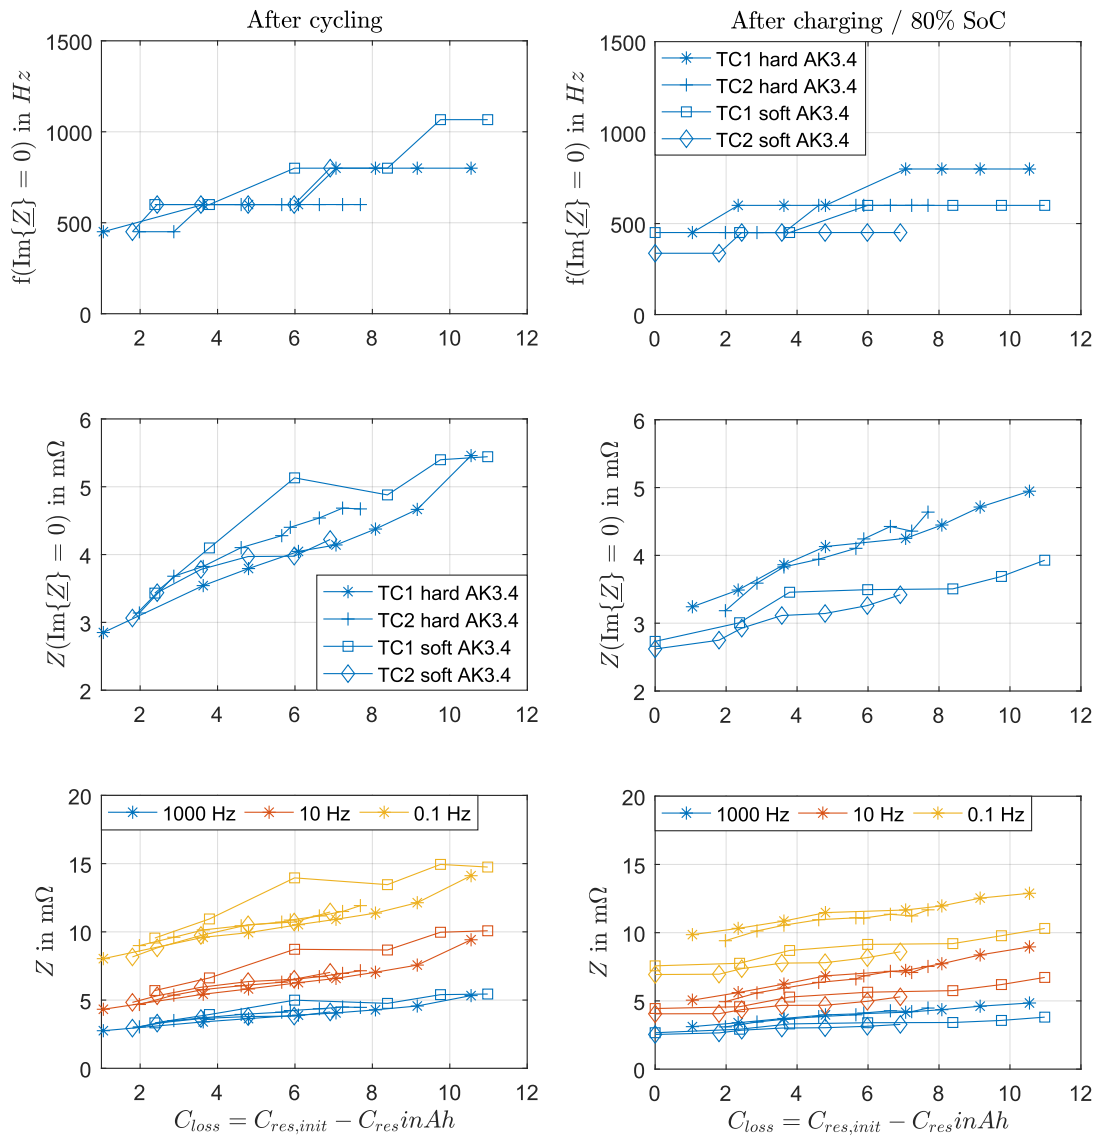

**Figure S5.** Single impedance values of all test cells in *hard* AK3.4 and *soft* AK3.4 test recorded with  $-3 I_{20}$  after cycling phase (left) and after charging (right). In in the upper graph the frequencies, at which the imaginary part of impedance is near zero, are plotted over capacity loss  $C_{\text{loss}}$  and in the middle graph the corresponding impedance amplitudes are given. In the lower graph impedance amplitudes measured at 0.1 Hz, 10 Hz and 1 kHz are presented. The data of different test cells are distinguishable by the marks and the different frequencies in the lower graph are distinguishable by the line color.
