# Supplementary material
Source: MDPI journal article supplement (https://www.mdpi.com/2076-3417/8/6/873)
Supplement: s1 [file s1]

# BTS - 600 Prüfprogramm: EISslave

Datum/Zeit : 20.11.2017 10:06:27

Version : V 1.600.395

Bediener : Digatron

Programm : EISslave

Titel : programm f EISmeter

| Schritt | Label | Prozedur | Sollwert                                                                                                    | Limit          | Aktion | Registrierung    |
|---------|-------|----------|-------------------------------------------------------------------------------------------------------------|----------------|--------|------------------|
| 1       |       | SET      |                                                                                                             |                |        | EisReg<br>10 min |
| 2       |       | BEG      |                                                                                                             |                |        |                  |
| 3       |       | PAU      |                                                                                                             | EISstart > 0.0 |        |                  |
| 4       |       | SET      | EISready = 0.0                                                                                              |                |        |                  |
| 5       |       | PAU      |                                                                                                             | 2 sec          |        |                  |
| 6       |       | EIS      | 0.1 mHz<br>6.0 kHz<br>2.0 AAcMax<br>4.0 VAcMax<br>-4.0 VAcMin<br>1.5 mVideal<br>2.0 AAcStart<br>1.0 EisTime | EISstart < 1.0 |        |                  |
| 7       |       | PAU      |                                                                                                             | 2 sec          |        |                  |
| 8       |       | SET      | EISready = 1.0                                                                                              |                |        |                  |
| 9       |       | ZYK      | 16*                                                                                                         |                |        |                  |
| 10      |       | STO      |                                                                                                             |                |        |                  |
