# Supplementary material
Source: MDPI journal article supplement (https://www.mdpi.com/2076-3417/8/6/873)
Supplement: s1 [file s1]

# BTS - 600 Prüfprogramm: AK34harX

Datum/Zeit : 03.10.2017 11:37:58

Version : V 1.600.395

Bediener : Digatron

Programm : AK34harX

Titel : Part of AK 34

| Schritt | Label        | Prozedur | Sollwert           | Limit              | Aktion     | Registrierung                     |
|---------|--------------|----------|--------------------|--------------------|------------|-----------------------------------|
| 1       |              | SET      |                    |                    |            | Multi<br>0.1 V<br>0.1 A<br>10 min |
| 2       |              | SET      |                    | > 2.8 V<br>< 1.0 V | UNT<br>UNT |                                   |
| 3       |              | SET      | EISstart = 0.0     |                    |            |                                   |
| !       | first Charge |          |                    |                    |            |                                   |
| 4       |              | PAU      |                    | 12 h               |            |                                   |
| 5       |              | LAD      | 2.6 V<br>5.0 ACN20 | 24 h               |            |                                   |
| 6       |              | PAU      |                    | 4 h                |            |                                   |
| 7       |              | ELA      | 4.0 ACN20          | 5.0 AhStep         |            |                                   |
| !       | Cycling      |          |                    |                    |            |                                   |
| 8       |              | BEG      |                    |                    |            |                                   |
| 9       |              | LAD      | 2.4 V<br>7.0 ACN20 | 40 min             |            |                                   |
| 10      |              | ELA      | 7.0 ACN20          | 30 min             |            |                                   |
| 11      |              | ZYK      | 85*                |                    |            |                                   |
