# Supplementary material
Source: MDPI journal article supplement (https://www.mdpi.com/2076-3417/8/6/873)
Supplement: s1 [file s1]

# BTS - 600 Prüfprogramm: fstCheck

Datum/Zeit : 14.09.2017 19:36:29

Version : V 1.600.395

Bediener : Digatron

Programm : fstCheck

Titel : first CheckUpTC

| Schritt | Label                                 | Prozedur | Sollwert           | Limit              | Aktion     | Registrierung                    |
|---------|---------------------------------------|----------|--------------------|--------------------|------------|----------------------------------|
| 1       |                                       | SET      |                    |                    |            | Multi<br>0.1 V<br>0.1 A<br>1 min |
| 2       |                                       | SET      |                    | > 3.0 V<br>< 1.0 V | UNT<br>UNT |                                  |
| 3       |                                       | SET      | ClimaOn = 1.0      |                    |            |                                  |
| 4       |                                       | SET      | SetTemp = 25.0     |                    |            |                                  |
| 5       |                                       | UNT      |                    |                    |            |                                  |
| 6       |                                       | PAU      |                    | 68 h               |            |                                  |
| !       | first EIS measurement (removed)       |          |                    |                    |            |                                  |
| !       | first charging and cap-test (removed) |          |                    |                    |            |                                  |
| 7       |                                       | LAD      | 5.0 ACN20<br>2.6 V | 30 h               |            |                                  |
| 8       |                                       | PAU      |                    | 4 h                |            |                                  |
| 9       |                                       | ELA      | 4.0 ACN20          | < 1.8 V            |            |                                  |
| 10      |                                       | PAU      |                    | 4 h                |            |                                  |
| 11      |                                       | LAD      | 5.0 ACN20<br>2.6 V | 24 h               |            |                                  |
| !       | EIS at 80 % SoC                       |          |                    |                    |            |                                  |
| 12      |                                       | PAU      |                    | 24 h               |            |                                  |
| 13      |                                       | UNT      |                    |                    |            |                                  |
| 14      |                                       | ELA      | 2.0 ACN20          | 2.0 AhStep         |            |                                  |
| 15      |                                       | EISwDCA  |                    |                    |            |                                  |
| 16      |                                       | PAU      |                    | 24 h               |            |                                  |
| 17      |                                       | EISwDCA  |                    |                    |            |                                  |
| !       | EIS at 40 % SoC                       |          |                    |                    |            |                                  |
| 18      |                                       | ELA      | 2.0 ACN20          | 4.0 AhStep         |            |                                  |
| 19      |                                       | EISwDCA  |                    |                    |            |                                  |
| !       | EIS at 0 % SoC                        |          |                    |                    |            |                                  |
| 20      |                                       | ELA      | 2.0 ACN20          | 4.0 AhStep         |            |                                  |
| 21      |                                       | EISwDCA  |                    |                    |            |                                  |
| !       | recharge                              |          |                    |                    |            |                                  |
| 22      |                                       | LAD      | 5.0 ACN20<br>2.6 V | 24 h               |            |                                  |
| 23      |                                       | PAU      |                    | 10 h               |            |                                  |
| 24      |                                       | STO      |                    |                    |            |                                  |
