# Supplementary material
Source: MDPI journal article supplement (https://www.mdpi.com/2076-3417/8/6/873)
Supplement: s1 [file s1]

# BTS - 600 Prüfprogramm: AK34soft

Datum/Zeit : 02.03.2018 11:35:47

Version : V 1.600.395

Bediener : Digatron

Programm : AK34soft

Titel : AK 34 cyc w. re-CHA

| Schritt | Label                                  | Prozedur | Sollwert           | Limit                  | Aktion     | Registrierung  |
|---------|----------------------------------------|----------|--------------------|------------------------|------------|----------------|
| 1       |                                        | SET      |                    |                        |            | Multi<br>1 min |
| 2       |                                        | SET      |                    | > 3.0 VNC<br>< 1.0 VNC | UNT<br>UNT |                |
| 3       |                                        | SET      | EISstart = 0.0     |                        |            |                |
| !       | EIS measurement after cycling          |          |                    |                        |            |                |
| 4       |                                        | EISwDCA  |                    |                        |            |                |
| !       | rest cap-Test & re-charge              |          |                    |                        |            |                |
| 5       |                                        | PAU      |                    | 4 h                    |            |                |
| 6       |                                        | ELA      | 4.0 ACN20          | < 1.8 V                |            |                |
| 7       |                                        | PAU      |                    | 2 h                    |            |                |
| 8       |                                        | LAD      | 5.0 ACN20<br>2.6 V | 24 h                   |            |                |
| 9       |                                        | PAU      |                    | 24 h                   |            |                |
| !       | set to 80 % and do EIS                 |          |                    |                        |            |                |
| 10      |                                        | ELA      | 2.0 ACN20          | 2.0 AhStep             |            |                |
| 11      |                                        | EISwDCA  |                    |                        |            |                |
| !       | discharge to 50% SoC for AK 34 cycling |          |                    |                        |            |                |
| 12      |                                        | ELA      | 4.0 ACN20          | 3.0 AhStep             |            |                |
| !       | AK 34 cycling                          |          |                    |                        |            |                |
| 13      |                                        | BEG      |                    |                        |            |                |
| 14      |                                        | LAD      | 2.4 V<br>7.0 ACN20 | 40 min                 |            |                |
| 15      |                                        | ELA      | 7.0 ACN20          | 30 min                 |            |                |
| 16      |                                        | ZYK      | 85*                |                        |            |                |
