# Supplementary material
Source: MDPI journal article supplement (https://www.mdpi.com/2076-3417/8/6/873)
Supplement: s1 [file s1]

# BTS - 600 Prüfprozedur: EISwDCA

Datum/Zeit : 14.12.2017 11:40:13

Version : V 1.600.395

Bediener : Digatron

Prozedur : EISwDCA

Titel : EIS meas with var DC

| Schritt | Label            | Prozedur | Sollwert           | Limit                   | Aktion | Registrierung |
|---------|------------------|----------|--------------------|-------------------------|--------|---------------|
| 1       |                  | PAU      |                    | 4:20 h                  |        |               |
| 2       |                  | SET      | EISstart = 1.0     |                         |        |               |
| 3       |                  | PAU      |                    | 0:40 h                  |        |               |
| 4       |                  | SET      | EISstart = 0.0     |                         |        |               |
| 5       |                  | PAU      |                    | EISready > 0.0<br>5 min |        |               |
| !       | EIS with 4.5 I20 |          |                    |                         |        |               |
| 6       |                  | BEG      |                    |                         |        |               |
| 7       |                  | SET      | Ahtarget = Ah      |                         |        |               |
| 8       |                  | SUB      | Ahtarget<br>0.5    |                         |        |               |
| 9       |                  | ELA      | 4.5 ACN20          | 0.1 AhStep<br>< 1.75 V  |        |               |
| 10      |                  | SET      | EISstart = 1.0     |                         |        |               |
| 11      |                  | ELA      | 4.5 ACN20          | 0.4 AhStep<br>< 1.75 V  |        | 10 sec        |
| 12      |                  | SET      | EISstart = 0.0     |                         |        |               |
| 13      |                  | PAU      |                    | EISready > 0.0<br>5 min |        |               |
| 14      |                  | ELA      | 2.0 ACN20          | < Ahtarget Ah           |        |               |
| 15      |                  | SET      | Ahtarget = Ah      |                         |        |               |
| 16      |                  | ADD      | Ahtarget<br>0.5    |                         |        |               |
| 17      |                  | LAD      | 4.5 ACN20<br>2.6 V | 0.1 AhStep<br>> 2.6 V   |        |               |
| 18      |                  | SET      | EISstart = 1.0     |                         |        |               |
| 19      |                  | LAD      | 4.5 ACN20<br>2.6 V | 0.4 AhStep<br>> 2.6 V   |        | 10 sec        |
| 20      |                  | SET      | EISstart = 0.0     |                         |        |               |
| 21      |                  | PAU      |                    | EISready > 0.0<br>5 min |        |               |
| 22      |                  | LAD      | 4.5 ACN20<br>2.6 V | > Ahtarget Ah           |        |               |
| 23      |                  | ZYK      | 2*                 |                         |        |               |
| !       | EIS with 1.5I20  |          |                    |                         |        |               |
| 24      |                  | PAU      |                    | 1 min                   |        |               |
| 25      |                  | BEG      |                    |                         |        |               |
| 26      |                  | SET      | Ahtarget = Ah      |                         |        |               |
| 27      |                  | SUB      | Ahtarget<br>0.5    |                         |        |               |
| 28      |                  | ELA      | 1.5 ACN20          | 0.1 AhStep<br>< 1.75 V  |        |               |
| 29      |                  | SET      | EISstart = 1.0     |                         |        |               |
| 30      |                  | ELA      | 1.5 ACN20          | 0.4 AhStep<br>< 1.75 V  |        | 10 sec        |
| 31      |                  | SET      | EISstart = 0.0     |                         |        |               |
| 32      |                  | PAU      |                    | EISready > 0.0<br>5 min |        |               |
| 33      |                  | ELA      | 1.5 ACN20          | < Ahtarget Ah           |        |               |
| 34      |                  | SET      | Ahtarget = Ah      |                         |        |               |

# BTS - 600 Prüfprozedur: EISwDCA

Datum/Zeit : 14.12.2017 11:40:13

Version : V 1.600.395

Bediener : Digatron

Prozedur : EISwDCA

Titel : EIS meas with var DC

| Schritt | Label         | Prozedur | Sollwert           | Limit                   | Aktion | Registrierung |
|---------|---------------|----------|--------------------|-------------------------|--------|---------------|
| 35      |               | ADD      | Ahtarget<br>0.5    |                         |        |               |
| 36      |               | LAD      | 1.5 ACN20<br>2.6 V | 0.1 AhStep<br>> 2.6 V   |        |               |
| 37      |               | SET      | EISstart = 1.0     |                         |        |               |
| 38      |               | LAD      | 1.5 ACN20<br>2.6 V | 0.4 AhStep<br>> 2.6 V   |        | 10 sec        |
| 39      |               | SET      | EISstart = 0.0     |                         |        |               |
| 40      |               | PAU      |                    | EISready > 0.0<br>5 min |        |               |
| 41      |               | LAD      | 1.5 ACN20<br>2.6 V | > Ahtarget Ah           |        |               |
| 42      |               | ZYK      | 2*                 |                         |        |               |
| !       | EIS with 8I20 |          |                    |                         |        |               |
| 43      |               | PAU      |                    | 1 min                   |        |               |
| 44      |               | BEG      |                    |                         |        |               |
| 45      |               | SET      | Ahtarget = Ah      |                         |        |               |
| 46      |               | SUB      | Ahtarget<br>0.5    |                         |        |               |
| 47      |               | ELA      | 8.0 ACN20          | 0.1 AhStep<br>< 1.75 V  |        |               |
| 48      |               | SET      | EISstart = 1.0     |                         |        |               |
| 49      |               | ELA      | 8.0 ACN20          | 0.4 AhStep<br>< 1.75 V  |        | 10 sec        |
| 50      |               | SET      | EISstart = 0.0     |                         |        |               |
| 51      |               | PAU      |                    | EISready > 0.0<br>5 min |        |               |
| 52      |               | ELA      | 2.0 ACN20          | < Ahtarget Ah           |        |               |
| 53      |               | SET      | Ahtarget = Ah      |                         |        |               |
| 54      |               | ADD      | Ahtarget<br>0.5    |                         |        |               |
| 55      |               | LAD      | 8.0 ACN20<br>2.6 V | 0.1 AhStep<br>> 2.6 V   |        |               |
| 56      |               | SET      | EISstart = 1.0     |                         |        |               |
| 57      |               | LAD      | 8.0 ACN20<br>2.6 V | 0.4 AhStep<br>> 2.6 V   |        | 10 sec        |
| 58      |               | SET      | EISstart = 0.0     |                         |        |               |
| 59      |               | PAU      |                    | EISready > 0.0<br>5 min |        |               |
| 60      |               | LAD      | 2.0 ACN20<br>2.6 V | > Ahtarget Ah           |        |               |
| 61      |               | ZYK      | 2*                 |                         |        |               |
| !       | EIS with 3I20 |          |                    |                         |        |               |
| 62      |               | PAU      |                    | 1 min                   |        |               |
| 63      |               | BEG      |                    |                         |        |               |
| 64      |               | SET      | Ahtarget = Ah      |                         |        |               |
| 65      |               | SUB      | Ahtarget<br>0.5    |                         |        |               |
| 66      |               | ELA      | 3.0 ACN20          | 0.1 AhStep<br>< 1.75 V  |        |               |
| 67      |               | SET      | EISstart = 1.0     |                         |        |               |

# BTS - 600 Prüfprozedur: EISwDCA

Datum/Zeit : 14.12.2017 11:40:13

Version : V 1.600.395

Bediener : Digatron

Prozedur : EISwDCA

Titel : EIS meas with var DC

| Schritt | Label         | Prozedur | Sollwert           | Limit                   | Aktion | Registrierung |
|---------|---------------|----------|--------------------|-------------------------|--------|---------------|
| 68      |               | ELA      | 3.0 ACN20          | 0.4 AhStep<br>< 1.75 V  |        | 10 sec        |
| 69      |               | SET      | EISstart = 0.0     |                         |        |               |
| 70      |               | PAU      |                    | EISready > 0.0<br>5 min |        |               |
| 71      |               | ELA      | 2.0 ACN20          | < Ahtarget Ah           |        |               |
| 72      |               | SET      | Ahtarget = Ah      |                         |        |               |
| 73      |               | ADD      | Ahtarget<br>0.5    |                         |        |               |
| 74      |               | LAD      | 3.0 ACN20<br>2.6 V | 0.1 AhStep<br>> 2.6 V   |        |               |
| 75      |               | SET      | EISstart = 1.0     |                         |        |               |
| 76      |               | LAD      | 3.0 ACN20<br>2.6 V | 0.4 AhStep<br>> 2.6 V   |        | 10 sec        |
| 77      |               | SET      | EISstart = 0.0     |                         |        |               |
| 78      |               | PAU      |                    | EISready > 0.0<br>5 min |        |               |
| 79      |               | LAD      | 3.0 ACN20<br>2.6 V | > Ahtarget Ah           |        |               |
| 80      |               | ZYK      | 2*                 |                         |        |               |
| !       | EIS with 1I20 |          |                    |                         |        |               |
| 81      |               | PAU      |                    | 1 min                   |        |               |
| 82      |               | BEG      |                    |                         |        |               |
| 83      |               | SET      | Ahtarget = Ah      |                         |        |               |
| 84      |               | SUB      | Ahtarget<br>0.5    |                         |        |               |
| 85      |               | ELA      | 1.0 ACN20          | 0.1 AhStep<br>< 1.75 V  |        |               |
| 86      |               | SET      | EISstart = 1.0     |                         |        |               |
| 87      |               | ELA      | 1.0 ACN20          | 0.4 AhStep<br>< 1.75 V  |        | 10 sec        |
| 88      |               | SET      | EISstart = 0.0     |                         |        |               |
| 89      |               | PAU      |                    | EISready > 0.0<br>5 min |        |               |
| 90      |               | ELA      | 1.0 ACN20          | < Ahtarget Ah           |        |               |
| 91      |               | SET      | Ahtarget = Ah      |                         |        |               |
| 92      |               | ADD      | Ahtarget<br>0.5    |                         |        |               |
| 93      |               | LAD      | 1.0 ACN20<br>2.6 V | 0.1 AhStep<br>> 2.6 V   |        |               |
| 94      |               | SET      | EISstart = 1.0     |                         |        |               |
| 95      |               | LAD      | 1.0 ACN20<br>2.6 V | 0.4 AhStep<br>> 2.6 V   |        | 10 sec        |
| 96      |               | SET      | EISstart = 0.0     |                         |        |               |
| 97      |               | PAU      |                    | EISready > 0.0<br>5 min |        |               |
| 98      |               | LAD      | 1.0 ACN20<br>2.6 V | > Ahtarget Ah           |        |               |
| 99      |               | ZYK      | 2*                 |                         |        |               |
| !       | EIS with 6I20 |          |                    |                         |        |               |
| 100     |               | PAU      |                    | 1 min                   |        |               |

# BTS - 600 Prüfprozedur: EISwDCA

Datum/Zeit : 14.12.2017 11:40:13

Version : V 1.600.395

Bediener : Digatron

Prozedur : EISwDCA

Titel : EIS meas with var DC

| Schritt | Label                   | Prozedur | Sollwert           | Limit                   | Aktion | Registrierung |
|---------|-------------------------|----------|--------------------|-------------------------|--------|---------------|
| 101     |                         | BEG      |                    |                         |        |               |
| 102     |                         | SET      | Ahtarget = Ah      |                         |        |               |
| 103     |                         | SUB      | Ahtarget<br>0.5    |                         |        |               |
| 104     |                         | ELA      | 6.0 ACN20          | 0.1 AhStep<br>< 1.75 V  |        |               |
| 105     |                         | SET      | EISstart = 1.0     |                         |        |               |
| 106     |                         | ELA      | 6.0 ACN20          | 0.4 AhStep<br>< 1.75 V  |        | 10 sec        |
| 107     |                         | SET      | EISstart = 0.0     |                         |        |               |
| 108     |                         | PAU      |                    | EISready > 0.0<br>5 min |        |               |
| 109     |                         | ELA      | 2.0 ACN20          | < Ahtarget Ah           |        |               |
| 110     |                         | SET      | Ahtarget = Ah      |                         |        |               |
| 111     |                         | ADD      | Ahtarget<br>0.5    |                         |        |               |
| 112     |                         | LAD      | 6.0 ACN20<br>2.6 V | 0.1 AhStep<br>> 2.6 V   |        |               |
| 113     |                         | SET      | EISstart = 1.0     |                         |        |               |
| 114     |                         | LAD      | 6.0 ACN20<br>2.6 V | 0.4 AhStep<br>> 2.6 V   |        | 10 sec        |
| 115     |                         | SET      | EISstart = 0.0     |                         |        |               |
| 116     |                         | PAU      |                    | EISready > 0.0<br>5 min |        |               |
| 117     |                         | LAD      | 6.0 ACN20<br>2.6 V | > Ahtarget Ah           |        |               |
| 118     |                         | ZYK      | 2*                 |                         |        |               |
| !       | repeat EIS with 4.5 I20 |          |                    |                         |        |               |
| 119     |                         | PAU      |                    | 1 min                   |        |               |
| 120     |                         | BEG      |                    |                         |        |               |
| 121     |                         | SET      | Ahtarget = Ah      |                         |        |               |
| 122     |                         | SUB      | Ahtarget<br>0.5    |                         |        |               |
| 123     |                         | ELA      | 4.5 ACN20          | 0.1 AhStep<br>< 1.75 V  |        |               |
| 124     |                         | SET      | EISstart = 1.0     |                         |        |               |
| 125     |                         | ELA      | 4.5 ACN20          | 0.4 AhStep<br>< 1.75 V  |        | 10 sec        |
| 126     |                         | SET      | EISstart = 0.0     |                         |        |               |
| 127     |                         | PAU      |                    | EISready > 0.0<br>5 min |        |               |
| 128     |                         | ELA      | 4.5 ACN20          | < Ahtarget Ah           |        |               |
| 129     |                         | SET      | Ahtarget = Ah      |                         |        |               |
| 130     |                         | ADD      | Ahtarget<br>0.5    |                         |        |               |
| 131     |                         | LAD      | 4.5 ACN20<br>2.6 V | 0.1 AhStep<br>> 2.6 V   |        |               |
| 132     |                         | SET      | EISstart = 1.0     |                         |        |               |
| 133     |                         | LAD      | 4.5 ACN20<br>2.6 V | 0.4 AhStep<br>> 2.6 V   |        | 10 sec        |
| 134     |                         | SET      | EISstart = 0.0     |                         |        |               |

# BTS - 600 Prüfprozedur: EISwDCA

Datum/Zeit : 14.12.2017 11:40:13  
Bediener : Digatron

Version : V 1.600.395

Prozedur : EISwDCA

Titel : EIS meas with var DC

| Schritt | Label | Prozedur | Sollwert           | Limit                   | Aktion | Registrierung |
|---------|-------|----------|--------------------|-------------------------|--------|---------------|
| 135     |       | PAU      |                    | EISready > 0.0<br>5 min |        |               |
| 136     |       | LAD      | 4.5 ACN20<br>2.6 V | > Ahtarget Ah           |        |               |
| 137     |       | ZYK      | 2*                 |                         |        |               |
