# Supplementary material
Source: MDPI journal article supplement (https://www.mdpi.com/2076-3417/8/6/873)
Supplement: s1 [file s1]

# BTS - 600 Prüfprogramm: fstCheck

Datum/Zeit : 20.02.2018 10:30:34  
Bediener : Digatron

Version : V 1.600.395

Programm : fstCheck

Titel : first CheckUpTC

| Schritt                       | Label | Prozedur | Sollwert           | Limit                   | Aktion     | Registrierung                    |
|-------------------------------|-------|----------|--------------------|-------------------------|------------|----------------------------------|
| 1                             |       | SET      |                    |                         |            | Multi<br>0.1 V<br>0.1 A<br>1 min |
| 2                             |       | SET      |                    | > 3.0 V<br>< 1.0 V      | UNT<br>UNT |                                  |
| 3                             |       | SET      | ClimaOn = 1.0      |                         |            |                                  |
| 4                             |       | SET      | SetTemp = 25.0     |                         |            |                                  |
| 5                             |       | UNT      |                    |                         |            |                                  |
| 6                             |       | PAU      |                    | 1 min                   |            |                                  |
| ! first EIS measurement       |       |          |                    |                         |            |                                  |
| 7                             |       | PAU      |                    | 4:20 h                  |            |                                  |
| 8                             |       | SET      | EISstart = 1.0     |                         |            |                                  |
| 9                             |       | PAU      |                    | 0:40 h                  |            |                                  |
| 10                            |       | SET      | EISstart = 0.0     |                         |            |                                  |
| 11                            |       | PAU      |                    | EISready > 0.0<br>5 min |            |                                  |
| ! first charging and cap-test |       |          |                    |                         |            |                                  |
| 12                            |       | LAD      | 5.0 ACN20<br>2.6 V | 30 h                    |            |                                  |
| 13                            |       | BEG      |                    |                         |            |                                  |
| 14                            |       | PAU      |                    | 4 h                     |            |                                  |
| 15                            |       | ELA      | 4.0 ACN20          | < 1.8 V                 |            |                                  |
| 16                            |       | PAU      |                    | 4 h                     |            |                                  |
| 17                            |       | LAD      | 5.0 ACN20<br>2.6 V | 24 h                    |            |                                  |
| 18                            |       | ZYK      | 3*                 |                         |            |                                  |
| ! EIS at 80 % SoC             |       |          |                    |                         |            |                                  |
| 19                            |       | PAU      |                    | 24 h                    |            |                                  |
| 20                            |       | ELA      | 2.0 ACN20          | 2.0 AhStep              |            |                                  |
| 21                            |       | EISwDCA  |                    |                         |            |                                  |
| ! EIS at 40 % SoC             |       |          |                    |                         |            |                                  |
| 22                            |       | ELA      | 2.0 ACN20          | 4.0 AhStep              |            |                                  |
| 23                            |       | EISwDCA  |                    |                         |            |                                  |
| ! EIS at 0 % SoC              |       |          |                    |                         |            |                                  |
| 24                            |       | ELA      | 2.0 ACN20          | 4.0 AhStep              |            |                                  |
| 25                            |       | EISwDCA  |                    |                         |            |                                  |
| ! recharge                    |       |          |                    |                         |            |                                  |
| 26                            |       | LAD      | 5.0 ACN20<br>2.6 V | 24 h                    |            |                                  |
| 27                            |       | PAU      |                    | 10 h                    |            |                                  |
| 28                            |       | STO      |                    |                         |            |                                  |
