# Supplementary material
Source: MDPI journal article supplement (https://www.mdpi.com/2076-3417/8/6/873)
Supplement: s1 [file s1]

# BTS - 600 Prüfprogramm: AK34harX

Datum/Zeit : 20.02.2018 10:50:21

Version : V 1.600.395

Bediener : Digatron

Programm : AK34harX

Titel : Part of AK 34

| Schritt | Label                        | Prozedur | Sollwert           | Limit              | Aktion     | Registrierung                     |
|---------|------------------------------|----------|--------------------|--------------------|------------|-----------------------------------|
| 1       |                              | SET      |                    |                    |            | Multi<br>0.1 V<br>0.1 A<br>10 min |
| 2       |                              | SET      |                    | > 2.8 V<br>< 1.0 V | UNT<br>UNT |                                   |
| 3       |                              | SET      | EISstart = 0.0     |                    |            |                                   |
| !       | first Charge                 |          |                    |                    |            |                                   |
| 4       |                              | PAU      |                    | 12 h               |            |                                   |
| 5       |                              | LAD      | 2.6 V<br>5.0 ACN20 | 24 h               |            |                                   |
| 6       |                              | PAU      |                    | 4 h                |            |                                   |
| 7       |                              | ELA      | 4.0 ACN20          | 5.0 AhStep         |            |                                   |
| !       | first Cycling after fstCheck |          |                    |                    |            |                                   |
| 8       |                              | BEG      |                    |                    |            |                                   |
| 9       |                              | LAD      | 2.4 V<br>7.0 ACN20 | 40 min             |            |                                   |
| 10      |                              | ELA      | 7.0 ACN20          | 30 min             |            |                                   |
| 11      |                              | ZYK      | 85*                |                    |            |                                   |
