# Supplementary material
Source: MDPI journal article supplement (https://www.mdpi.com/2076-3417/8/6/873)

Discharging DC-currents after cycling

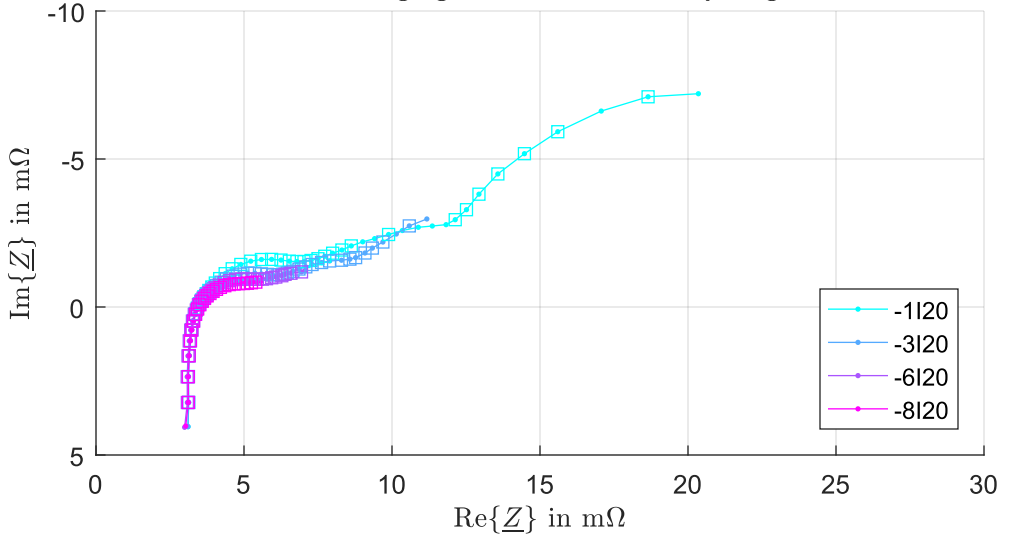

Discharging DC-currents at 80% SoC

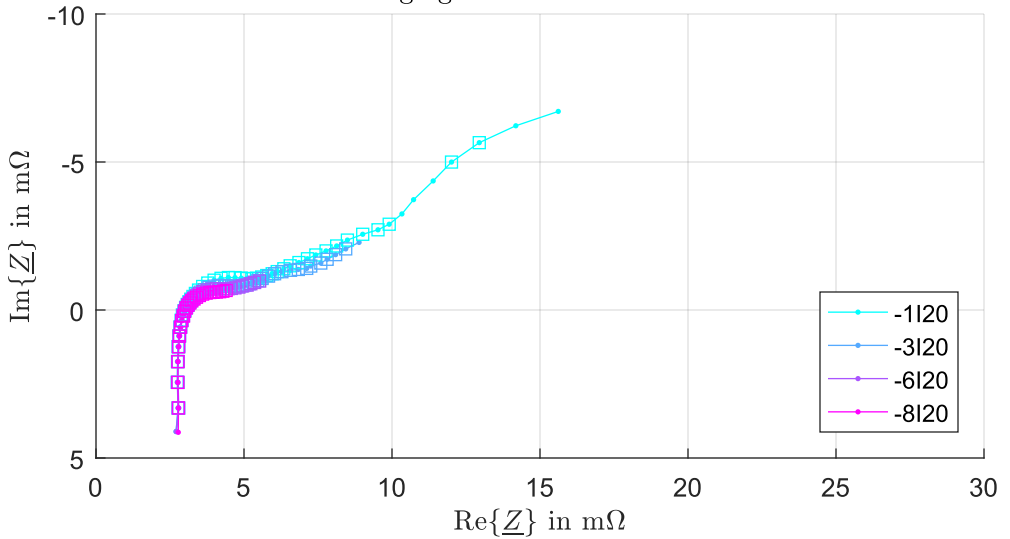

Supplement: s1 [file s1]

After cycling

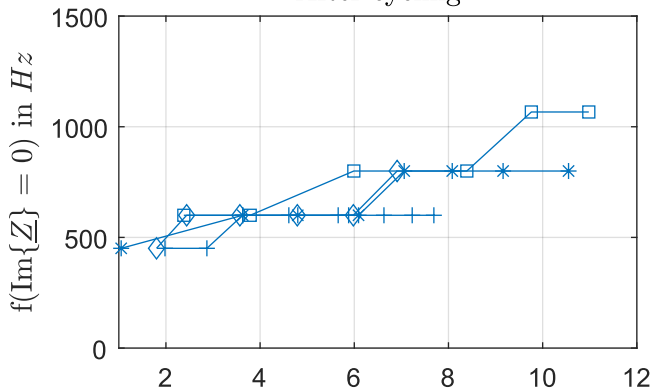

After charging / 80% SoC

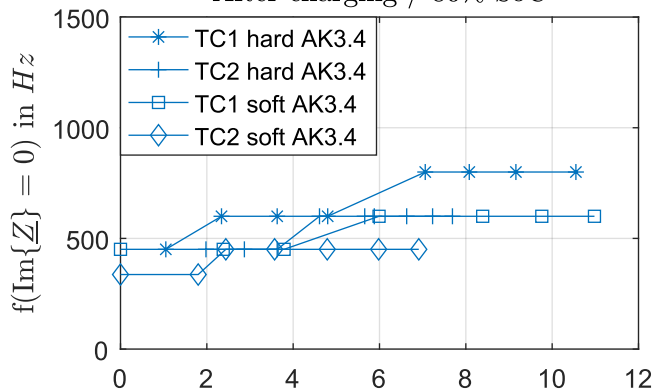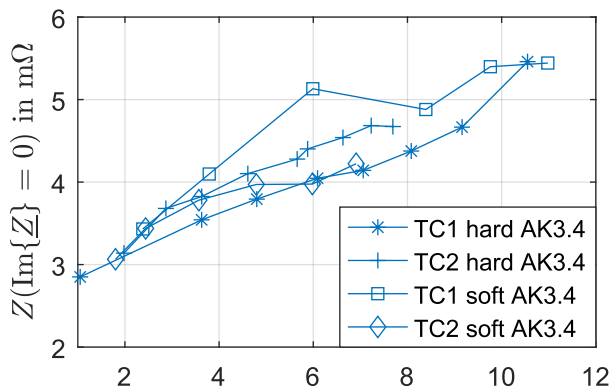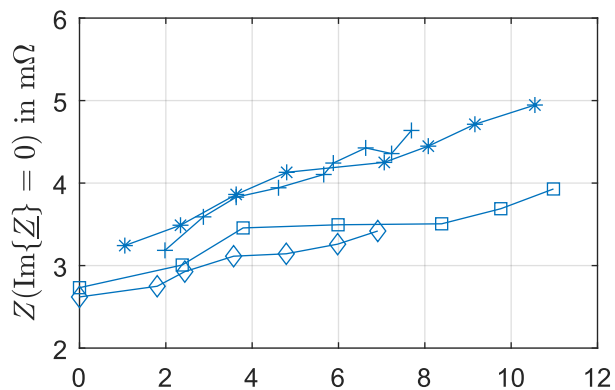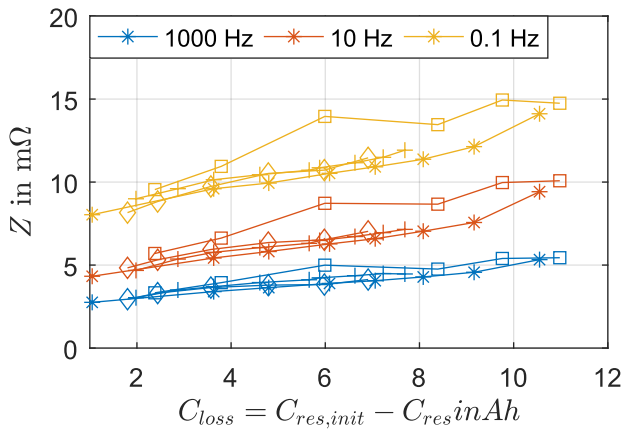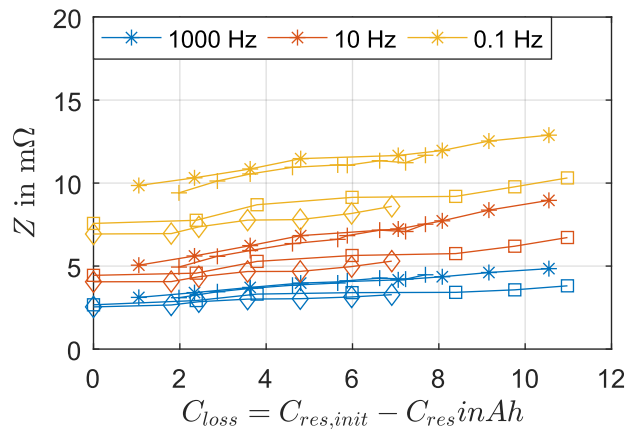

Supplement: s1 [file s1]

Charging DC-currents after cycling

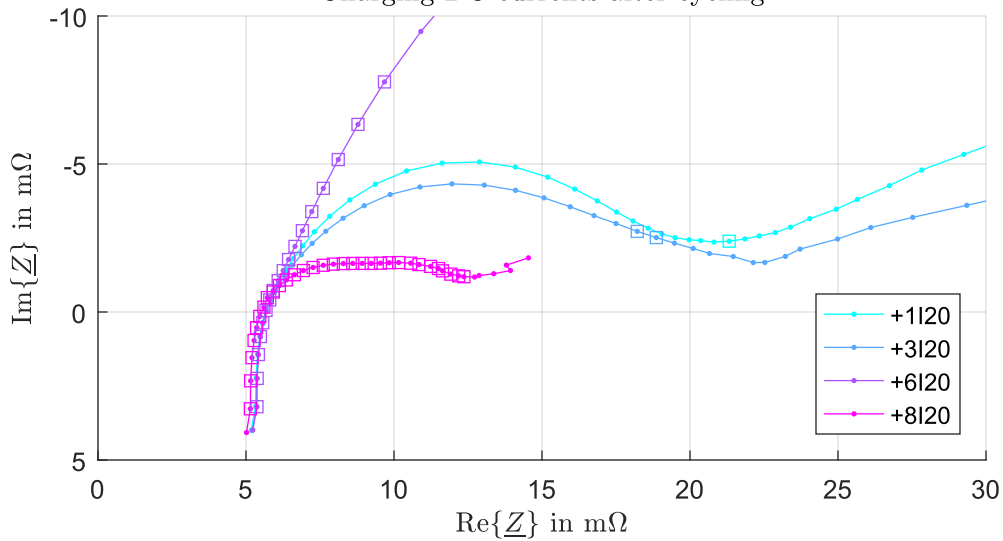

Charging DC-currents at 80% SoC

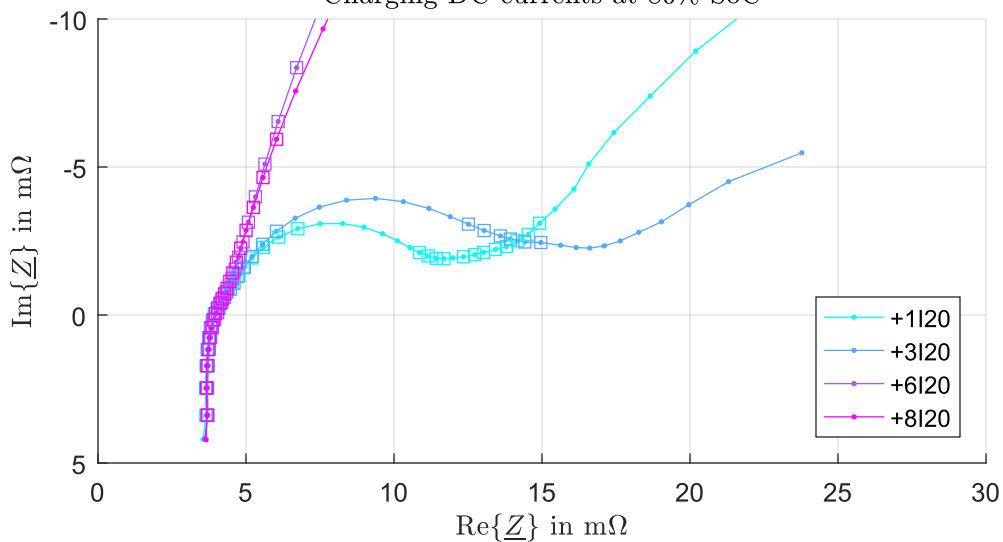

Supplement: s1 [file s1]

Charging DC-currents after cycling

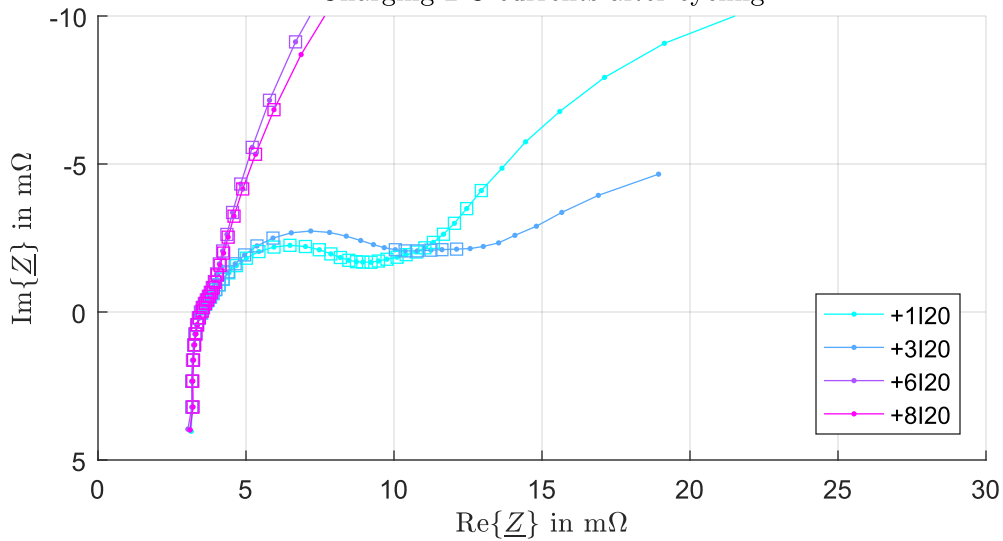

Charging DC-currents at 80% SoC

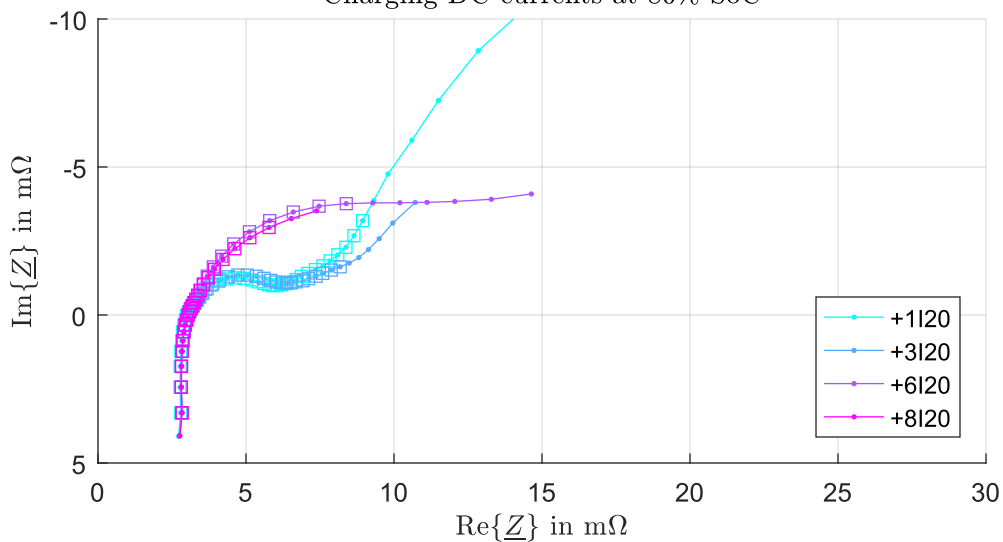

Supplement: s1 [file s1]

Discharging DC-currents after cycling

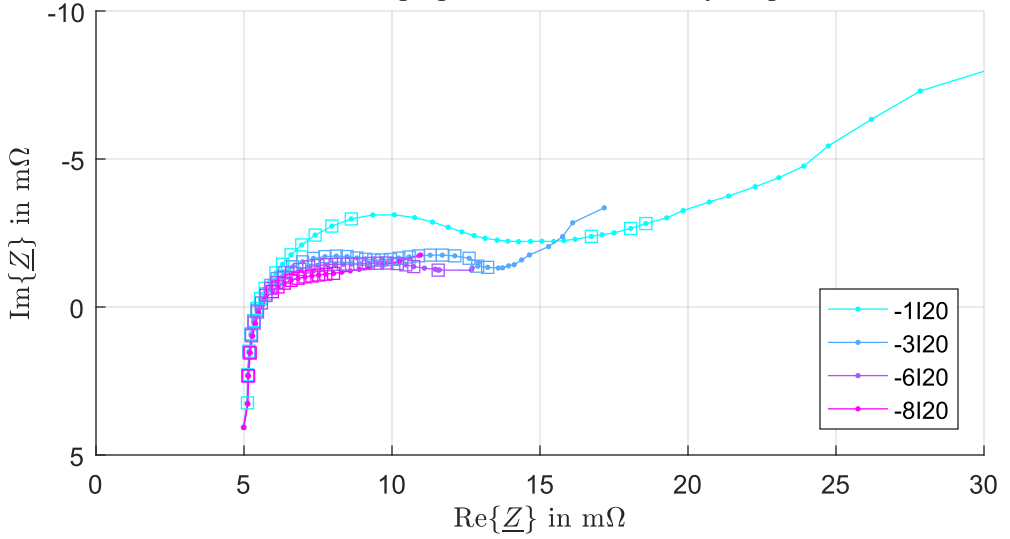

Discharging DC-currents at 80% SoC

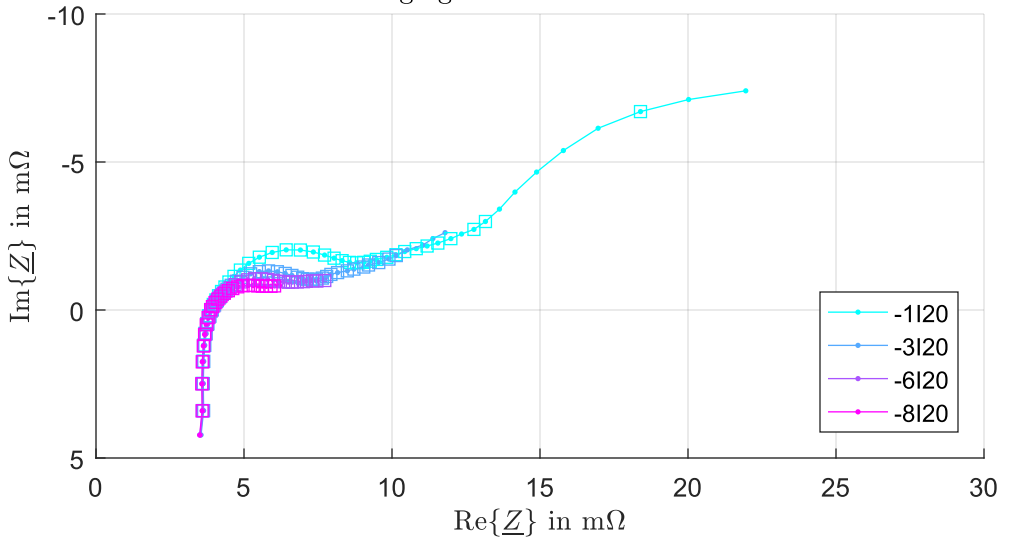

Supplement: s1 [file s1]
